# Supplementary material for: Long-ranged Protein-glycan Interactions Stabilize von Willebrand Factor A2 Domain from Mechanical Unfolding
Source: PubMed Central journal article supplement (PMC6207679; doi:10.1038/s41598-018-34374-y), 2018-10-30
Supplement: 41598_2018_34374_MOESM1_ESM.pdf [file 41598_2018_34374_MOESM1_ESM.pdf]

## **Supplementary Information**

### **Long-ranged Protein-glycan Interactions Stabilize von Willebrand Factor A2 Domain from Mechanical Unfolding**

**Chuqiao Dong<sup>1</sup>, Jumin Lee<sup>2</sup>, Seonghoon Kim<sup>2</sup>, Whitney Lai<sup>3</sup>, Edmund B. Webb III<sup>1</sup>,  
Alparslan Oztekin<sup>1</sup>, X. Frank Zhang<sup>1,3</sup>, and Wonpil Im<sup>2,3,\*</sup>**

<sup>1</sup> Department of Mechanical Engineering and Mechanics, Lehigh University, Bethlehem, PA,  
18015, United States

<sup>2</sup> Department of Biological Sciences, Lehigh University, Bethlehem, PA, 18015, United States

<sup>3</sup> Department of Bioengineering, Lehigh University, Bethlehem, PA, 18015, United States

**Figure S1.** (A): SASA profile as a function of  $D_{EE}$  for system  $S_{C(repeat)}^{+G}$  and those in **Figure 2A**. (B): Energy profile as a function of  $D_{EE}$  for systems  $S_{C(repeat)}^{+G}$  and  $S_C^{+G}$ . (C): Snapshot of structures in state E for systems  $S_{C(repeat)}^{+G}$  and  $S_C^{+G}$ . Only the unfolded structures are labeled. (D): Force profile as a function of  $D_{EE}$  for systems  $S_{C(repeat)}^{+G}$  and  $S_C^{+G}$ . Solid lines are the averages over every 1000-step of the raw data (shaded lines of the same color).

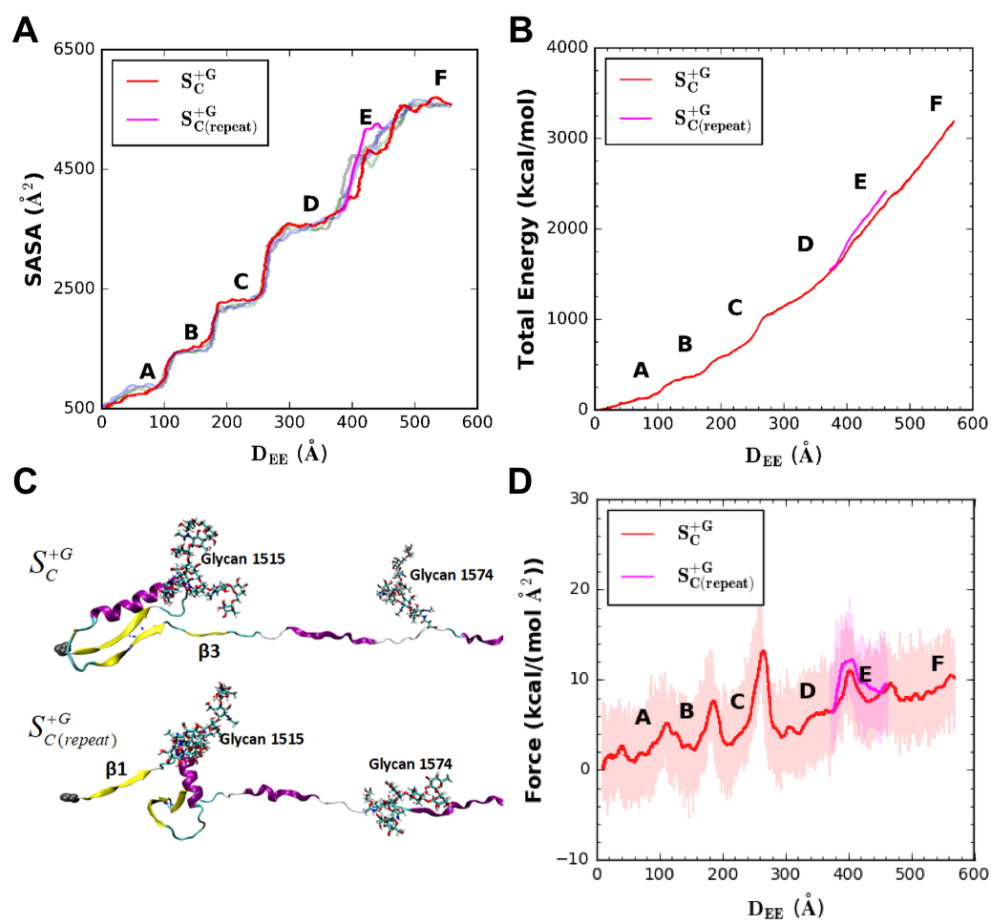

**Figure S2.** (A): SASA profile as a function of  $D_{EE}$  for independent simulations and those in **Figure 2A**. (B): Energy profile as a function of  $D_{EE}$  for independent simulations and those in **Figure 6**. (C,D): Force profiles as a function of  $D_{EE}$  for independent simulations and those in **Figure 5**. Solid lines are the averages over every 1000-step of the raw data (shaded lines of the same color).

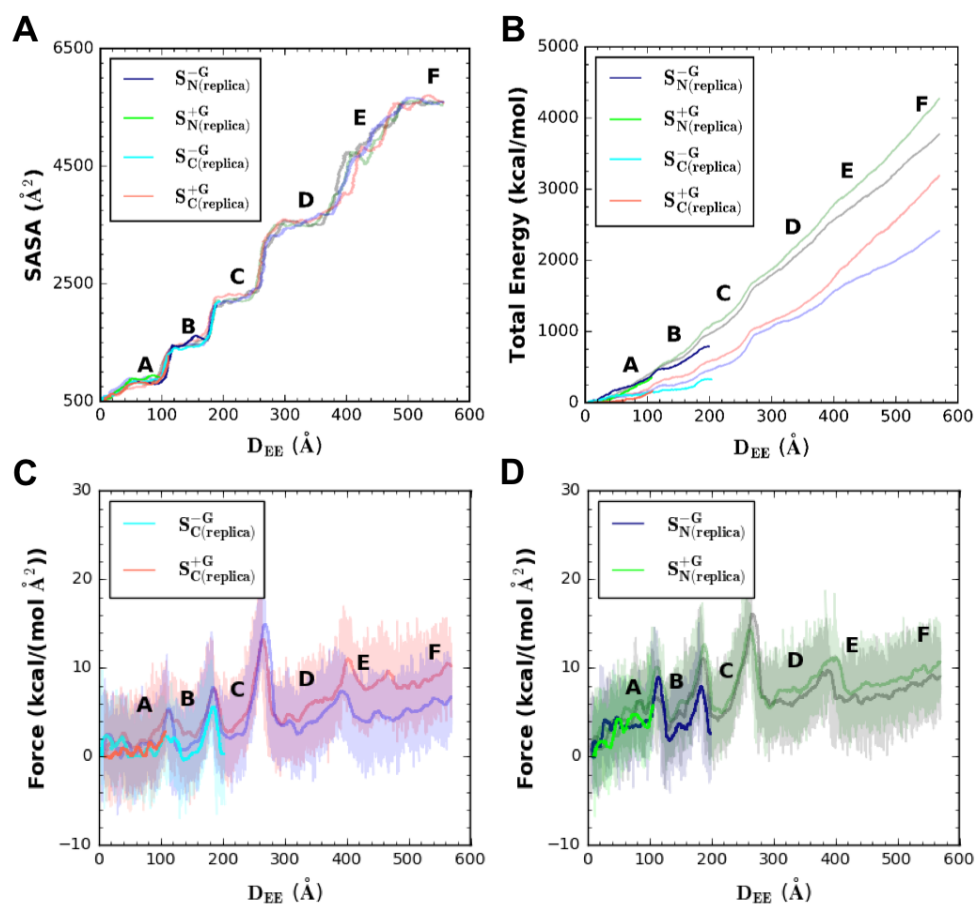

**Figure S3.** (A) Force profiles for different systems:  $S_{N(add)}^{+G}$  (green) and  $S_{N(add)}^{-G}$  (back). (B) The corresponding COM profiles. Each solid line represents the averaged value of four independent simulations, and the error bars with the same color indicate the standard errors among them.

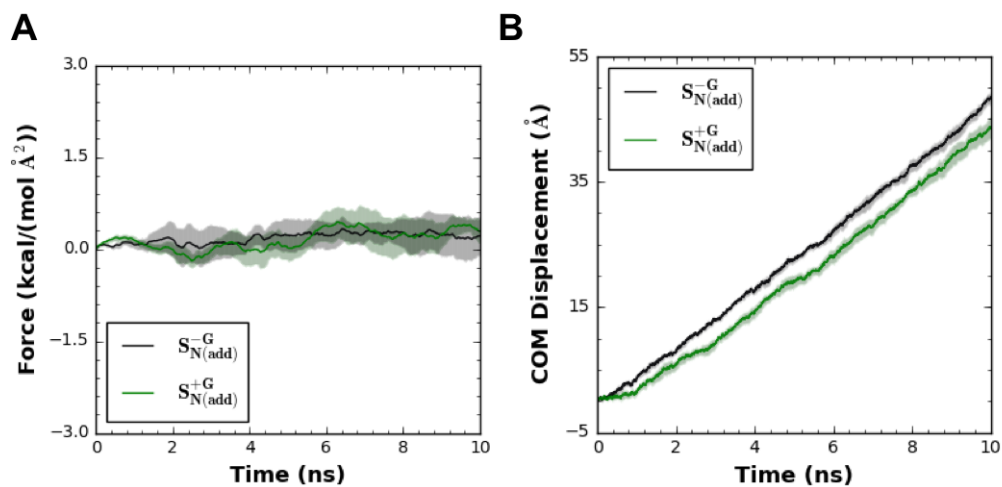

**Movie S1.** Interaction pattern changes as a function of time.
